# Supplementary material for: Luminescence study of a self-activated and rare earth activated Sr3La(VO4)3phosphor potentially applicable in W-LEDs
Source: Royal Society of Chemistry journal article supplement (doi:10.1039/c4tc02783c), 2015-01-01
Supplement: c4tc02783c1.pdf [file c4tc02783c1.pdf]

# Electronic Supplementary Information

## Luminescence Study of Self-activated and Rare earth Activated $\text{Sr}_3\text{La}(\text{VO}_4)_3$ Phosphor Potentially Applicable in W-LEDs

Jiangcong Zhou,<sup>a</sup> Feng Huang,<sup>\*ab</sup> Ju Xu,<sup>ab</sup> Hui Chen<sup>a</sup> and Yuansheng Wang<sup>\*ab</sup>

### Figure S1—S4

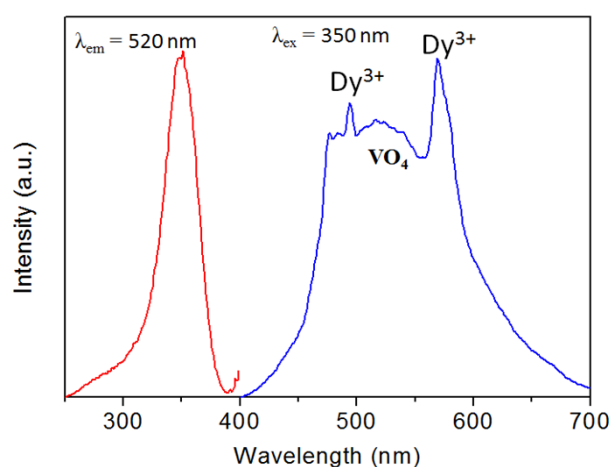

**Figure S1.** PL and PLE spectra of  $\text{Sr}_3\text{La}_{0.95}\text{Dy}_{0.05}(\text{VO}_4)_3$ .

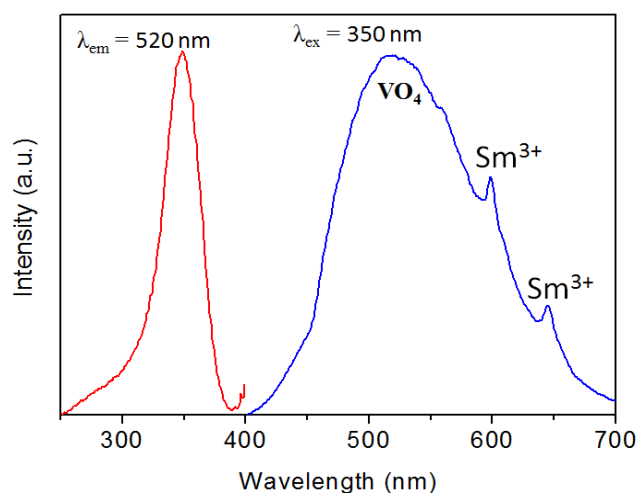

**Figure S2.** PL and PLE spectra of  $\text{Sr}_3\text{La}_{0.95}\text{Sm}_{0.05}(\text{VO}_4)_3$ .

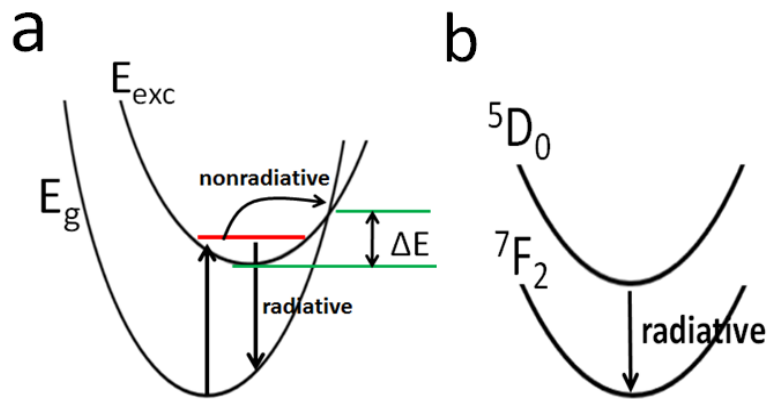

**Figure S3.** Schematic diagrams of configuration coordinate for (a) the excitation state and ground state of  $(VO_4)^{3-}$ , and (b) the  $^5D_0$  and  $^7F_2$  states of  $Eu^{3+}$ .

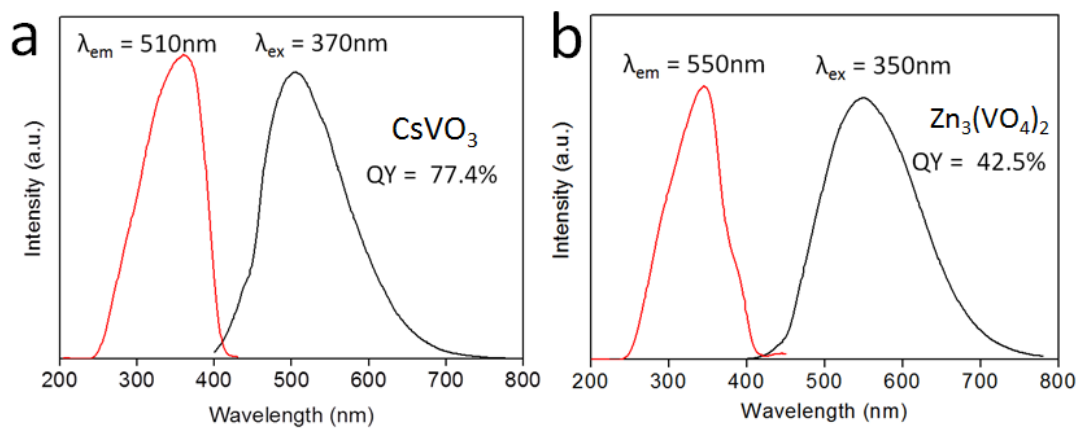

**Figure S4.** PLE and PL spectra of the prepared phosphors: (a)  $CsVO_3$ ; (b)  $Zn_3(VO_4)_2$ .
